# Supplementary material for: Impact of Prolonged Elevated Heart Rate on the Incidence of Major Adverse Cardiac Events in Critically Ill Patients with Underlying Chronic Heart Failure
Source: Research Square preprint supplement (doi:10.21203/rs.3.rs-8250314/v1), 2025-12-31
Supplement: Supplementary file 1 [file 2834c600bbc111e4545ee07e.docx]

**Appendix**

**
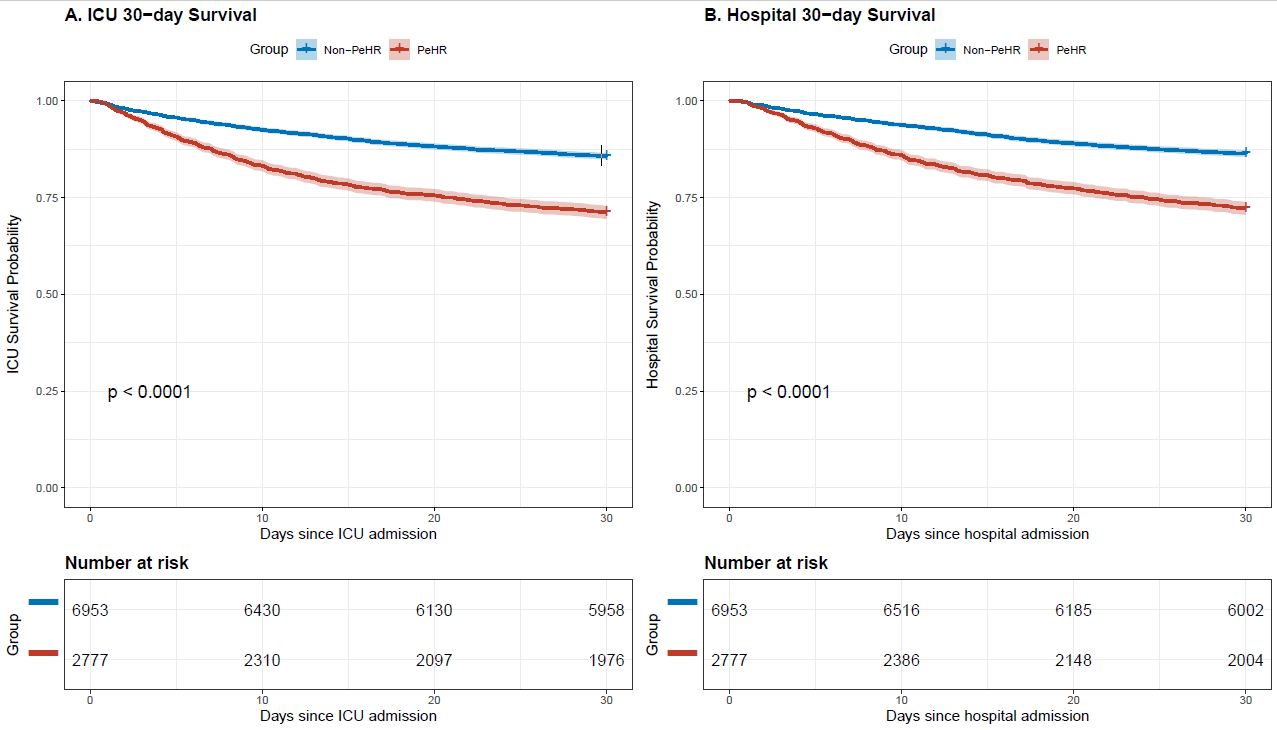
**

**Supplementary Figure 1(30-day survival curve)**

**
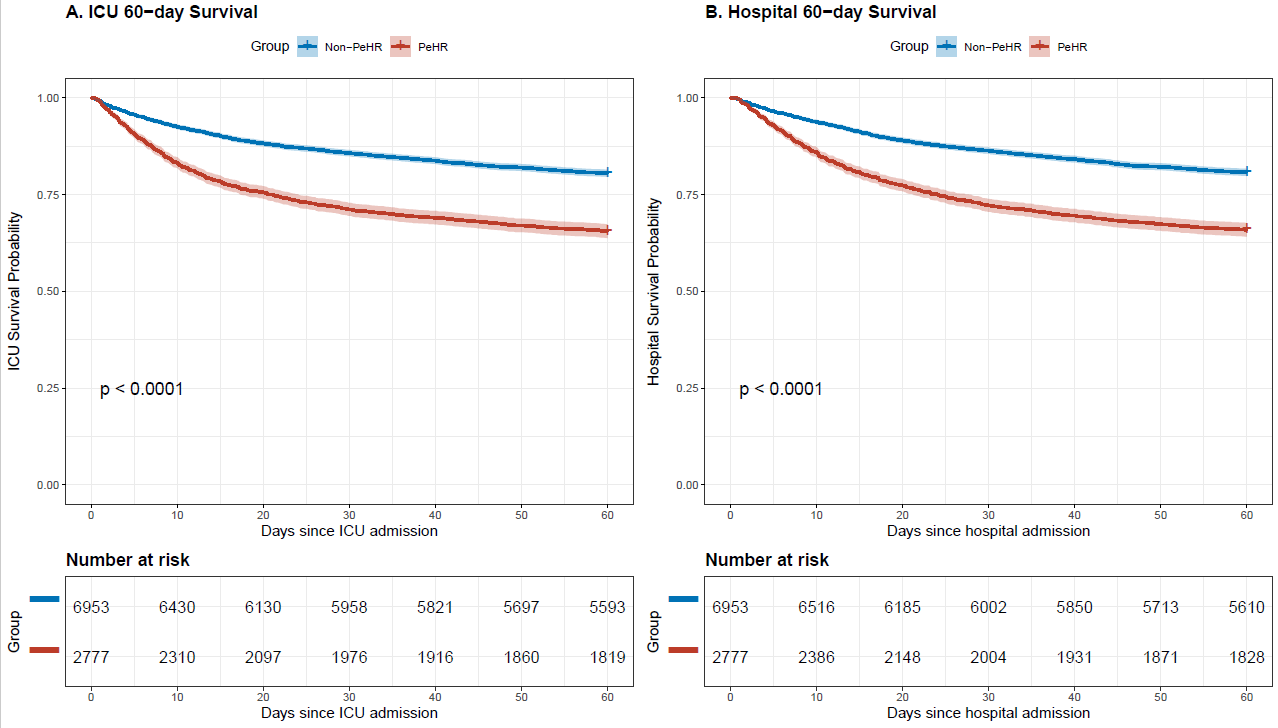
**

**Supplementary Figure 2(60-day survival curve)**

**Supplementary Table 1 Univariate Logistic Regression**

| **Characteristic** | **OR** | **95% CI** | ***p*-value** |
| --- | --- | --- | --- |
| **Pehr** |  |  |  |
| 0 | — | — |  |
| 1 | 1.29 | 1.18, 1.40 | <0.001 |
| **Gender** |  |  |  |
| Female | — | — |  |
| Male | 1.37 | 1.26, 1.49 | <0.001 |
| **Admission_age** | 1.01 | 1.01, 1.02 | <0.001 |
| **Race** |  |  |  |
| White | — | — |  |
| Black | 0.69 | 0.60, 0.79 | <0.001 |
| Asian | 0.91 | 0.69, 1.20 | 0.499 |
| Other | 1.19 | 1.07, 1.32 | 0.002 |
| **Heart_rate** | 1.00 | 1.00, 1.00 | 0.345 |
| **MBP** | 1.00 | 0.99, 1.00 | <0.001 |
| **Resp_rate** | 1.01 | 1.00, 1.02 | <0.001 |
| **Temperature** | 0.91 | 0.87, 0.97 | 0.001 |
| **Spo2** | 0.99 | 0.98, 1.00 | 0.012 |
| **BUN** | 1.01 | 1.01, 1.01 | <0.001 |
| **Creatinine** | 1.08 | 1.06, 1.11 | <0.001 |
| **Bicarbonate** | 0.95 | 0.95, 0.96 | <0.001 |
| **Glucose** | 1.00 | 1.00, 1.00 | <0.001 |
| **Calcium** | 0.96 | 0.91, 1.01 | 0.112 |
| **Chloride** | 0.99 | 0.99, 1.00 | 0.025 |
| **Potassium** | 1.19 | 1.13, 1.25 | <0.001 |
| **Sodium** | 0.99 | 0.98, 1.00 | 0.003 |
| **PT** | 1.00 | 1.00, 1.01 | 0.217 |
| **PTT** | 1.01 | 1.01, 1.01 | <0.001 |
| **INR** | 1.02 | 0.98, 1.06 | 0.308 |
| **Platelet** | 1.00 | 1.00, 1.00 | 0.077 |
| **WBC** | 1.02 | 1.01, 1.03 | <0.001 |
| **Hemoglobin** | 0.99 | 0.97, 1.00 | 0.102 |
| **Sofa Score** | 1.07 | 1.05, 1.08 | <0.001 |
| **Aps iii Score** | 1.02 | 1.01, 1.02 | <0.001 |
| **Saps ii Score** | 1.03 | 1.03, 1.03 | <0.001 |
| **Mechanical Ventilation** |  |  |  |
| No | — | — |  |
| Yes | 1.12 | 1.01, 1.24 | 0.025 |
| **CRRT** |  |  |  |
| No | — | — |  |
| Yes | 2.55 | 1.92, 3.43 | <0.001 |
| **Vasopressor** |  |  |  |
| No | — | — |  |
| Yes | 1.59 | 1.46, 1.72 | <0.001 |
| **Inotrope** |  |  |  |
| No | — | — |  |
| Yes | 1.66 | 1.43, 1.93 | <0.001 |
| **Diuretic** |  |  |  |
| No | — | — |  |
| Yes | 1.09 | 0.99, 1.19 | 0.066 |
| **β-blocker** |  |  |  |
| No | — | — |  |
| Yes | 1.14 | 1.05, 1.25 | 0.002 |
| **Anticoagulant** |  |  |  |
| No | — | — |  |
| Yes | 1.18 | 1.05, 1.32 | 0.007 |
| **Antiplatelet** |  |  |  |
| No | — | — |  |
| Yes | 2.15 | 1.97, 2.35 | <0.001 |
| **Fluid Balance (24h)** | 1.00 | 1.00, 1.00 | <0.001 |
| **AKI** |  |  |  |
| No | — | — |  |
| Yes | 1.48 | 1.32, 1.65 | <0.001 |
| **Sepsis** |  |  |  |
| No | — | — |  |
| Yes | 1.26 | 1.16, 1.37 | <0.001 |
| **Renal Disease** |  |  |  |
| No | — | — |  |
| Yes | 1.37 | 1.26, 1.48 | <0.001 |
| **Diabetes** |  |  |  |
| No | — | — |  |
| Yes | 1.41 | 1.30, 1.53 | <0.001 |
| **Malignant Cancer** |  |  |  |
| No | — | — |  |
| Yes | 1.01 | 0.89, 1.15 | 0.874 |
| **Cerebrovascular Disease** |  |  |  |
| No | — | — |  |
| Yes | 1.31 | 1.17, 1.47 | <0.001 |
| **Chronic Pulmonary Disease** |  |  |  |
| No | — | — |  |
| Yes | 0.83 | 0.76, 0.90 | <0.001 |
| **Severe Liver Disease** |  |  |  |
| No | — | — |  |
| Yes | 0.93 | 0.73, 1.18 | 0.556 |
| **Metastatic Solid Tumor** |  |  |  |
| No | — | — |  |
| Yes | 0.93 | 0.75, 1.15 | 0.521 |
| **Anemia** |  |  |  |
| No | — | — |  |
| Yes | 1.12 | 1.03, 1.22 | 0.005 |
| **Hypertension** |  |  |  |
| No | — | — |  |
| Yes | 0.84 | 0.76, 0.93 | 0.001 |
| **Atrial Fibrillation** |  |  |  |
| No | — | — |  |
| Yes | 0.91 | 0.84, 0.98 | 0.019 |

**Supplementary Table 2  AIC Values for Sequential Logistic Regression Models Evaluating the Association Between PeHR and MACE**

| **Model** | **N** | **AIC** |
| --- | --- | --- |
| **M1** | 9730 | 13248.44569 |
| **M2** | 9730 | 12733.56388 |
| **M3** | 9730 | 12618.33623 |
| **M4** | 9730 | 12231.68077 |

**Supplementary Table 3 Subgroup analysis**

| **Subgroup** | **Level** | **Exposure** | **n (%)** | **OR (95% CI)** | ***P*** | ***P* for Interaction** |
| --- | --- | --- | --- | --- | --- | --- |
| **Age Group** | >=65 | pehr = 1 | 7566 (77.8%) | 1.41 (1.27, 1.56) | <0.001 | 0.010 |
| **Age Group** | <65 | pehr = 1 | 2164 (22.2%) | 1.06 (0.88, 1.28) | 0.531 |  |
| **Gender** | Female | pehr = 1 | 4254 (43.7%) | 1.35 (1.18, 1.54) | <0.001 |  |
| **Gender** | Male | pehr = 1 | 5476 (56.3%) | 1.25 (1.11, 1.41) | <0.001 | 0.439 |
| **Hypertension** | No | pehr = 1 | 7969 (81.9%) | 1.29 (1.17, 1.43) | <0.001 | 0.704 |
| **Hypertension** | Yes | pehr = 1 | 1761 (18.1%) | 1.24 (1.00, 1.53) | 0.050 |  |
| **Atrial Fibrillation** | No | pehr = 1 | 4443 (45.7%) | 1.27 (1.10, 1.46) | 0.001 | 0.566 |
| **Atrial Fibrillation** | Yes | pehr = 1 | 5287 (54.3%) | 1.34 (1.19, 1.50) | <0.001 |  |
| **Diabetes** | No | pehr = 1 | 5421 (55.7%) | 1.29 (1.14, 1.45) | <0.001 | 0.882 |
| **Diabetes** | Yes | pehr = 1 | 4309 (44.3%) | 1.31 (1.14, 1.49) | <0.001 |  |
| **Chronic Pulmonary Disease** | No | pehr = 1 | 6022 (61.9%) | 1.32 (1.18, 1.48) | <0.001 | 0.504 |
| **Chronic Pulmonary Disease** | Yes | pehr = 1 | 3708 (38.1%) | 1.24 (1.08, 1.43) | 0.003 |  |
| **Severe Liver Disease** | No | pehr = 1 | 9456 (97.2%) | 1.28 (1.17, 1.39) | <0.001 | 0.271 |
| **Severe Liver Disease** | Yes | pehr = 1 | 274 (2.8%) | 1.71 (1.02, 2.89) | 0.042 |  |
| **Aki Flg** | No | pehr = 1 | 1634 (16.8%) | 0.89 (0.67, 1.18) | 0.419 |  |
| **Aki Flg** | Yes | pehr = 1 | 8096 (83.2%) | 1.29 (1.17, 1.42) | <0.001 | 0.013 |
| **Sepsis** | No | pehr = 1 | 4469 (45.9%) | 0.89 (0.76, 1.04) | 0.131 |  |
| **Sepsis** | Yes | pehr = 1 | 5261 (54.1%) | 1.48 (1.32, 1.66) | <0.001 | <0.001 |
| **Vasopressor Flag** | No | pehr = 1 | 6015 (61.8%) | 0.99 (0.88, 1.12) | 0.899 |  |
| **Vasopressor Flag** | Yes | pehr = 1 | 3715 (38.2%) | 1.51 (1.32, 1.73) | <0.001 | <0.001 |
| **Mechanical Ventilation Flag** | No | pehr = 1 | 2031 (20.9%) | 1.50 (1.23, 1.83) | <0.001 |  |
| **Mechanical Ventilation Flag** | Yes | pehr = 1 | 7699 (79.1%) | 1.23 (1.12, 1.36) | <0.001 | 0.086 |
| **Crrt Flag** | No | pehr = 1 | 9527 (97.9%) | 1.28 (1.17, 1.40) | <0.001 | 0.764 |
| **Crrt Flag** | Yes | pehr = 1 | 203 (2.1%) | 1.16 (0.65, 2.12) | 0.614 |  |

**Supplementary Table 4 Missing number of variables**

| **Variables** | **Missing number (%)** |
| --- | --- |
| Albumin | 68.44 |
| ALT | 49.16 |
| Bilirubin | 48.75 |
| AST | 48.60 |
| Height | 47.15 |
| Icu Survival | 46.46 |
| Hosp Survival | 46.46 |
| Post Icu Survival | 46.46 |
| Post Hosp Survival | 46.46 |
| Weight | 42.57 |
| Lactate | 42.12 |
| PTT | 13.29 |
| INR | 12.62 |
| PT | 12.62 |
| Calcium | 6.89 |
| Temperature | 4.15 |
| WBC | 1.80 |
| Hemoglobin | 1.79 |
| Platelet | 1.77 |
| Glucose | 1.55 |
| Bicarbonate | 1.22 |
| BUN | 1.21 |
| Potassium | 1.21 |
| Sodium | 1.20 |
| Chloride | 1.17 |
| Creatinine | 1.17 |
| GCS | 0.32 |
| Spo2 | 0.21 |
| Resp | 0.11 |
| Heart | 0.08 |
| MBP | 0.08 |
| SOFA | 0.08 |
| Insufficient | 0.01 |
| Pehr | 0.01 |
| Icu Outtime | 0.01 |
